# Supplementary material for: Dual-responsive PEG–lipid polyester nanoparticles for siRNA and vaccine delivery elicit anti-cancer immune responses by modulating tumor microenvironment
Source: Royal Society of Chemistry journal article supplement (doi:10.1039/d3bm01265d), 2023-01-01
Supplement: d3bm01265d1.pdf [file d3bm01265d1.pdf]

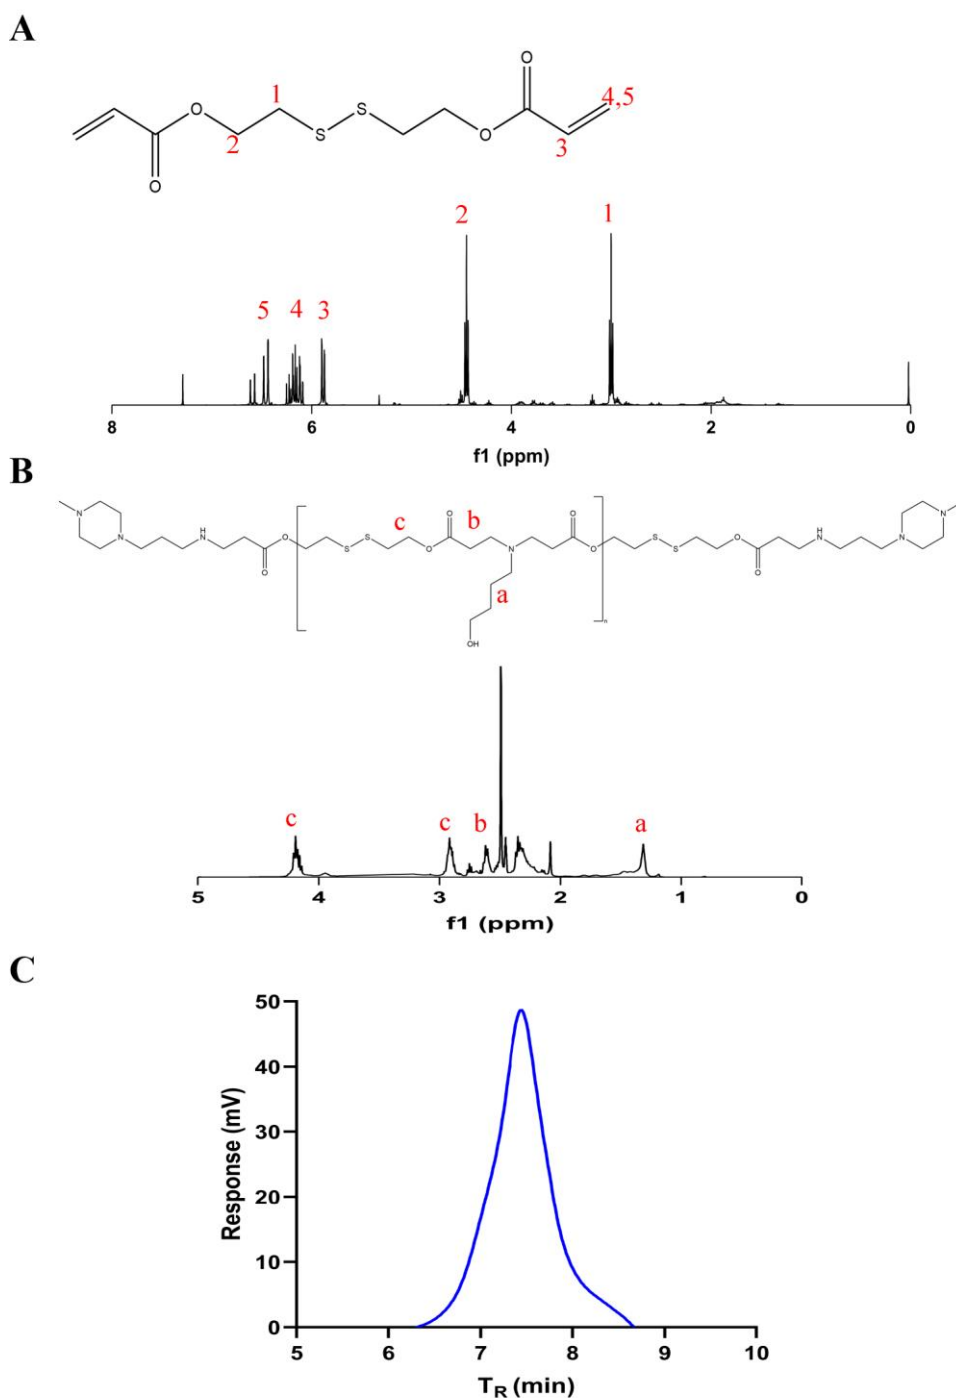

Fig S1.  $^1\text{H-NMR}$  spectrogram of (A) BR6 and (B) BR647. For BR6: ( $\text{d}_6\text{-CDCl}_3$ , 400Hz)  $\delta$  ppm 6.52 (ddd,1H), 6.21-6.08 (m,1H), 5.88 (dd,1H), 4.45 (t,2H), 3.26-2.85 (m,2H); for BR647: ( $\text{d}_6\text{-DMSO}$ , 400Hz)  $\delta$  ppm 4.28-4.00 (m,4H), 2.91 (dt,4H), 2.77-2.53 (m,4H), 2.43-2.18 (m,6H), 1.65-1.14 (m,4H). (C) GPC curves of BR647.  $M_n$  3983 Da,  $M_w$  6649 Da, PDI 1.67.

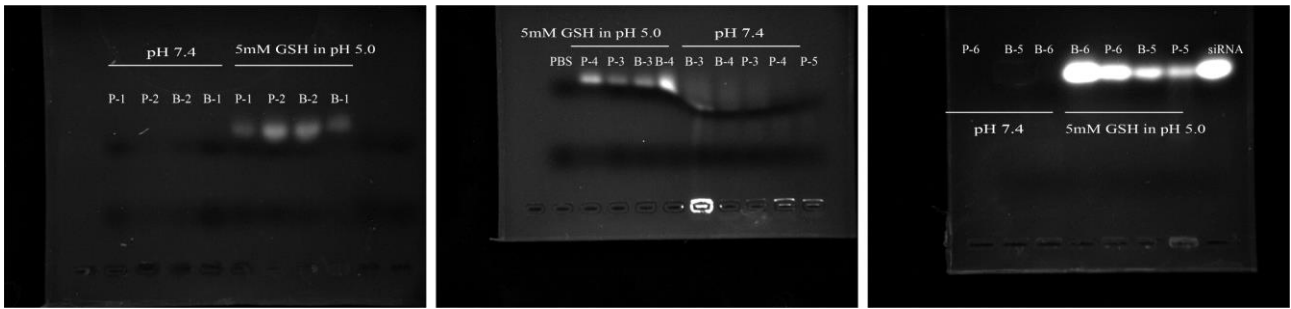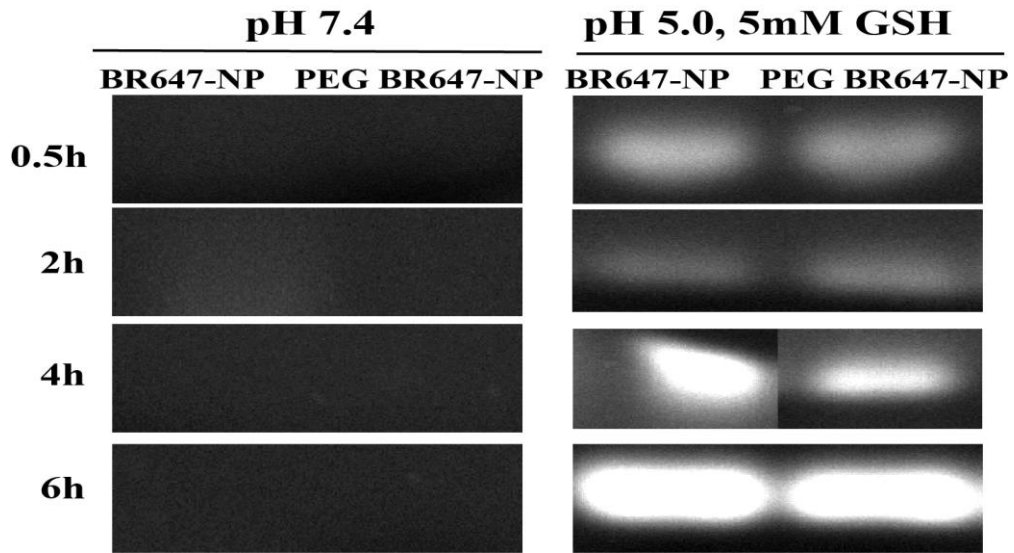

Fig S2. The release of BR647-NPs in PBS (pH 7.4) and 5 mM GSH PBS (pH 5.0) was evaluated by agarose gel. B: BR647-NP, P: PEG BR647-NP. 1: 15 min, 2: 0.5 h, 3: 2 h; 4: 4 h, 5: 5h, 6: 6 h.

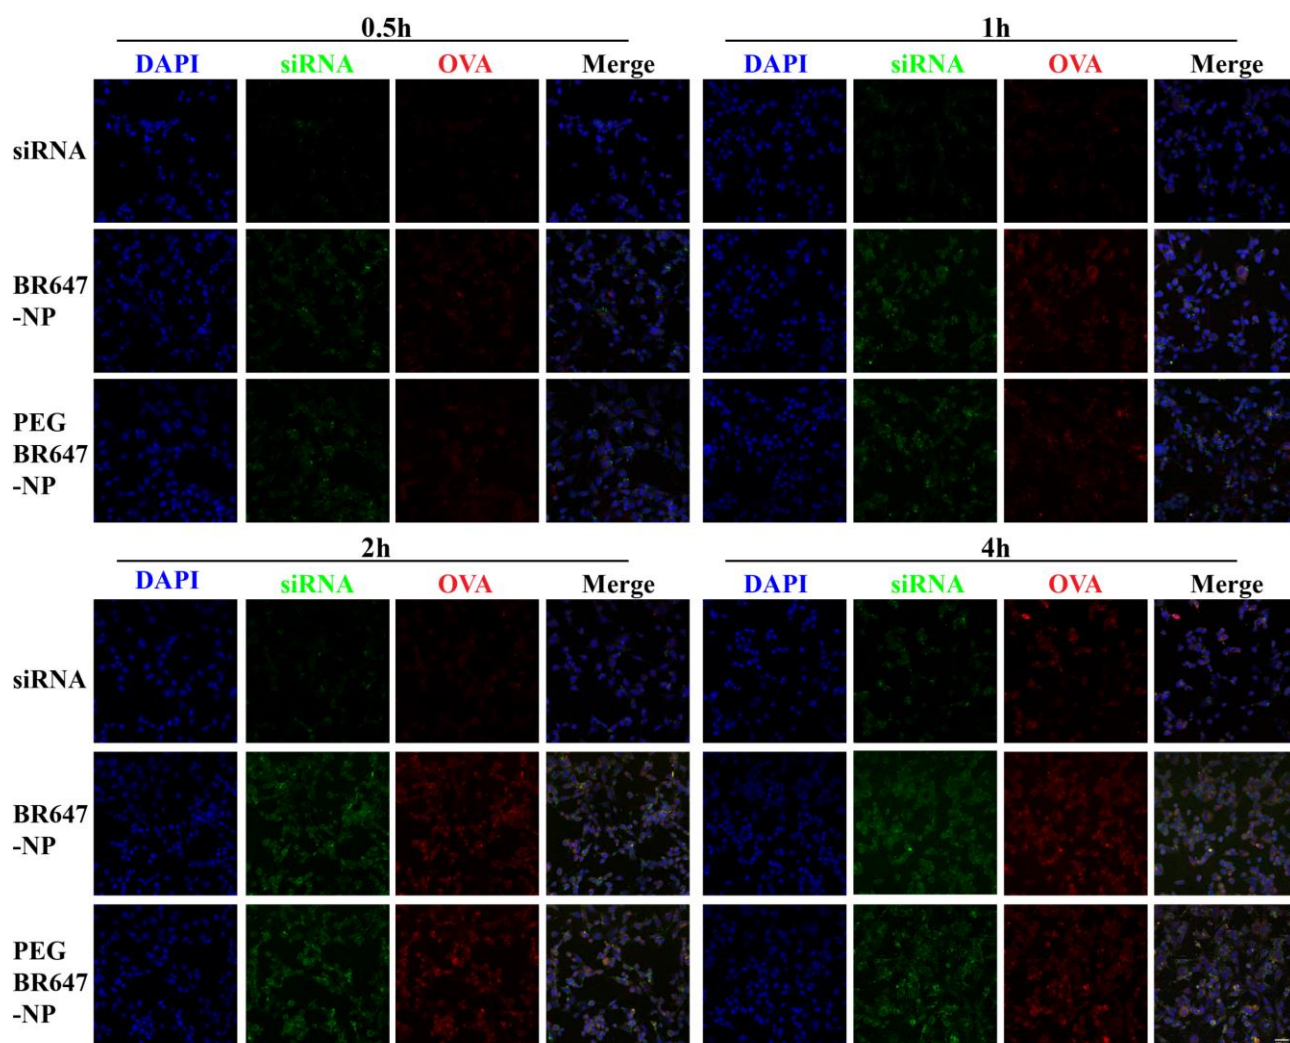

Fig S3. Fluorescence imaging of DC<sub>2.4</sub> cells after 0.5, 1, 2 and 4 h incubation with BR647-NPs@FAM-STAT3 siRNA/CY3-OVA and FAM-STAT3 siRNA/CY3-OVA solution (50 nM FAM-STAT3 siRNA, 2  $\mu$ g/mL CY3-OVA). Nuclei are stained with DAPI (blue), FAM labeled STAT3 siRNA is green, CY3 labeled OVA is red ( $\times 200$ , scale bar: 100  $\mu$ m).

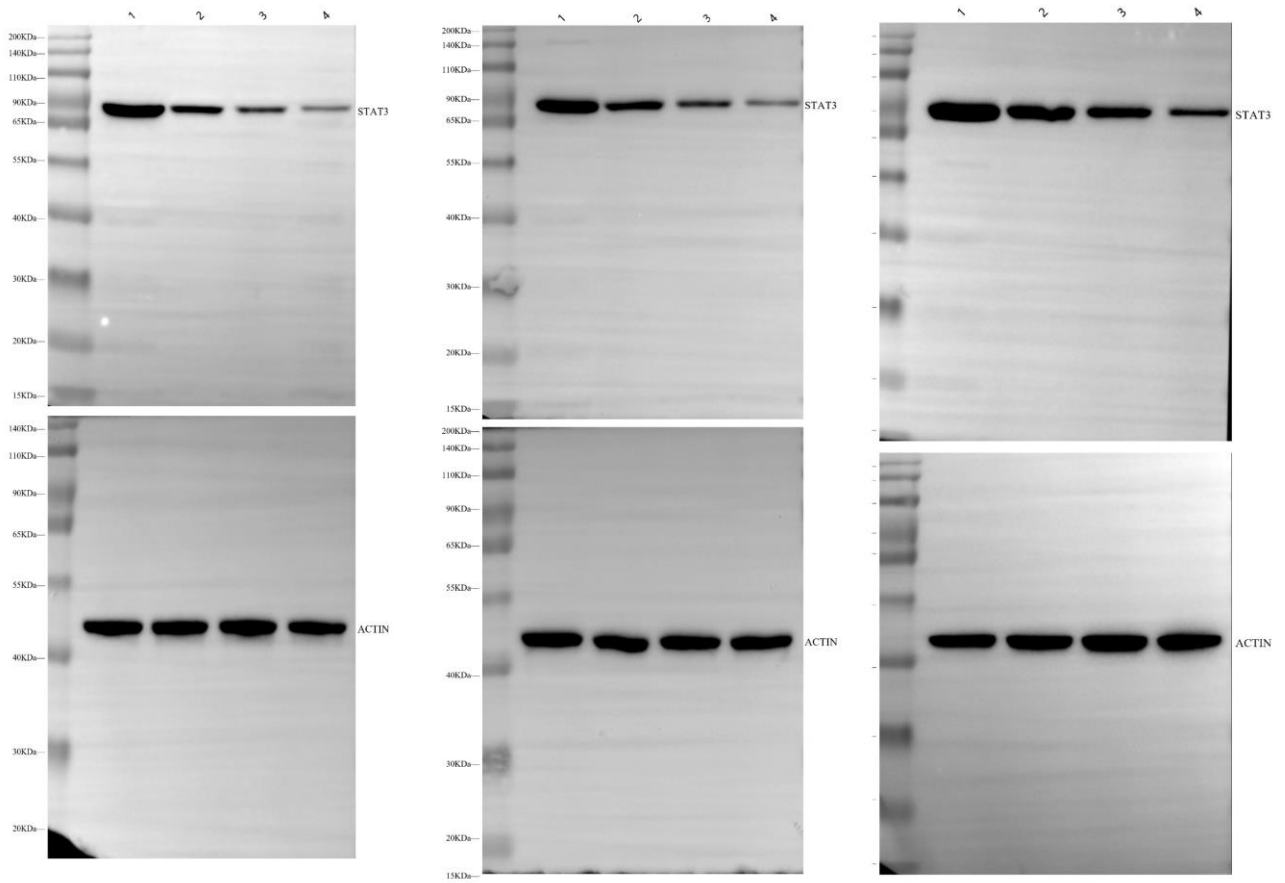

Fig S4. The expression of STAT3 in B16F10 cells. B16F10 cells were pretreated with PBS (1), STAT3 siRNA/OVA (2), BR647-NP (3), PEG BR647-NP (4) (50 nM STAT3 siRNA and 2  $\mu$ g/mL OVA) for 72 h (n=3).

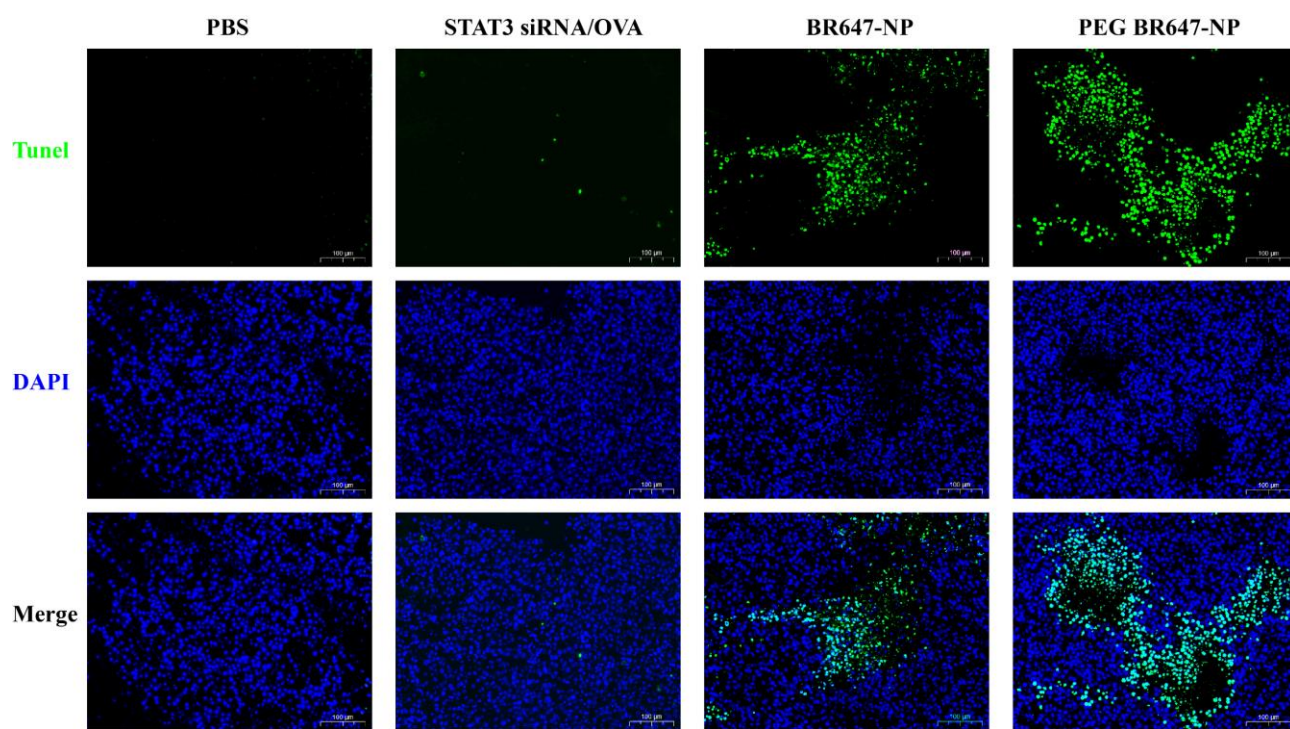

Fig S5. Cell apoptosis in tumors was detected using TUNEL assay ( $\times 200$ , scale bar: 100  $\mu\text{m}$ ). B16-OVA tumor-bearing C57BL/6 mice were s.c. injected every 5 days for a total of 3 immunizations (1 nmol/mouse STAT3 siRNA and 40  $\mu\text{g}$ /mouse OVA).

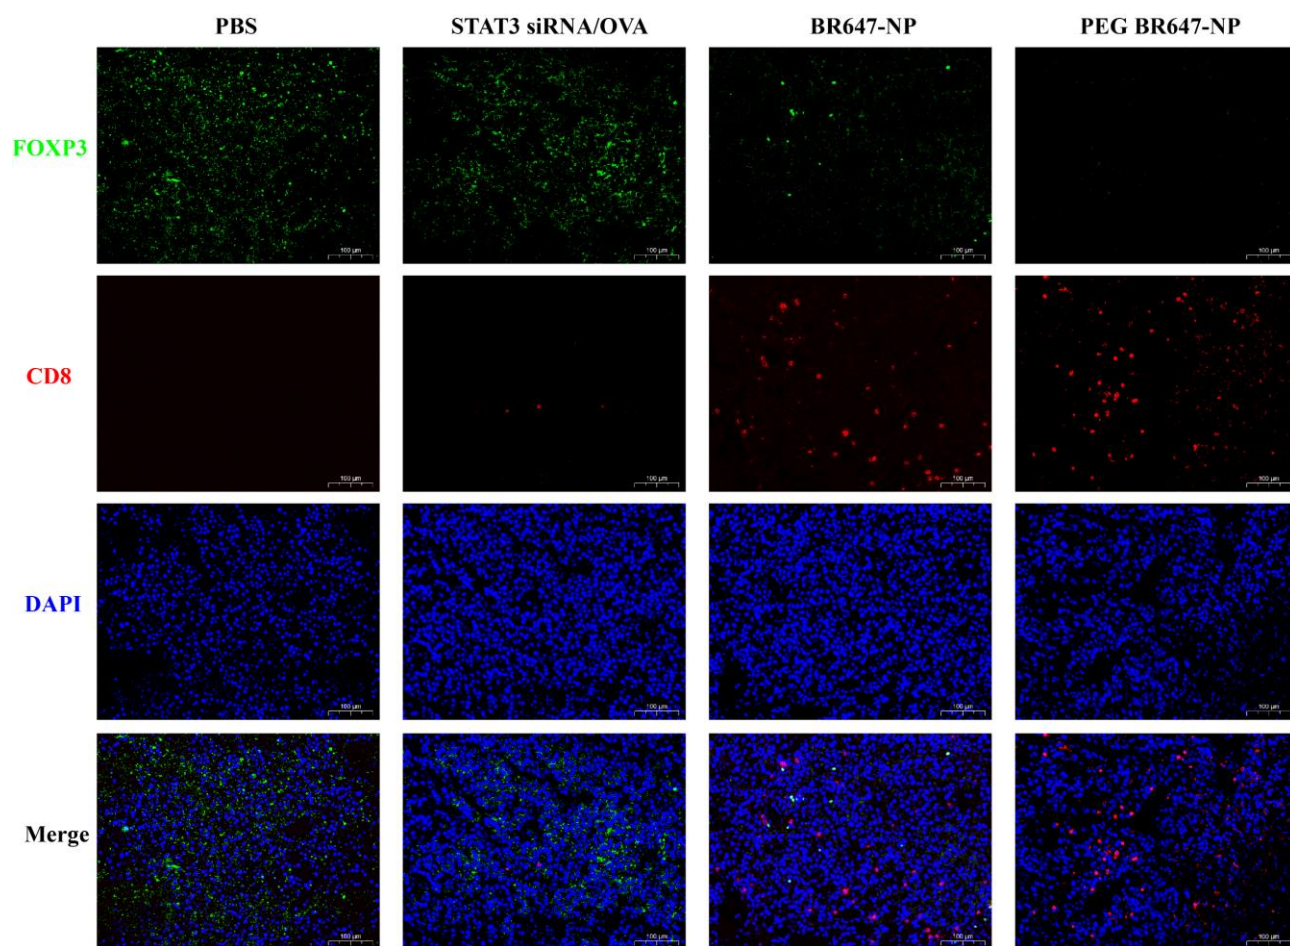

Fig S6. CD8 and FOXP3 immunofluorescent staining test results in tumors of different groups ( $\times 400$ , scale bar: 100  $\mu\text{m}$ ).

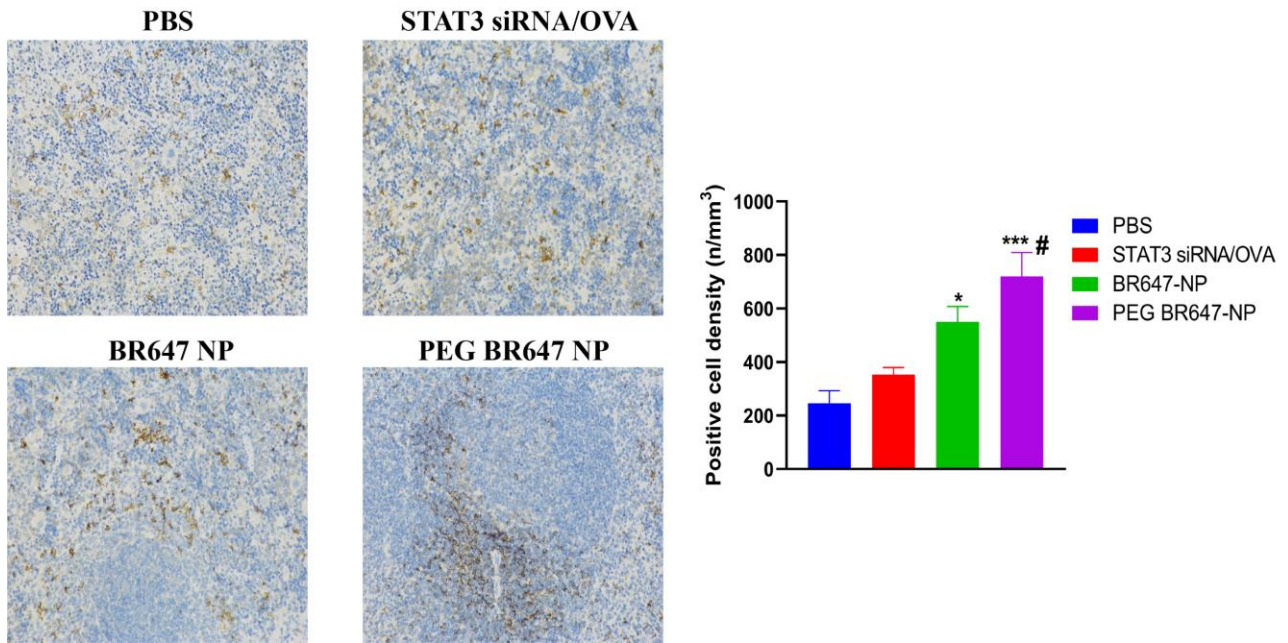

Fig S7. CD8 immunohistochemical test results in spleen of different groups, and the CD8<sup>+</sup>T cells density of all groups (n = 3). \**P* < 0.05 and \*\*\**P* < 0.001 vs STAT3 siRNA/OVA, #*P* < 0.05 vs BR647-NP (×200).

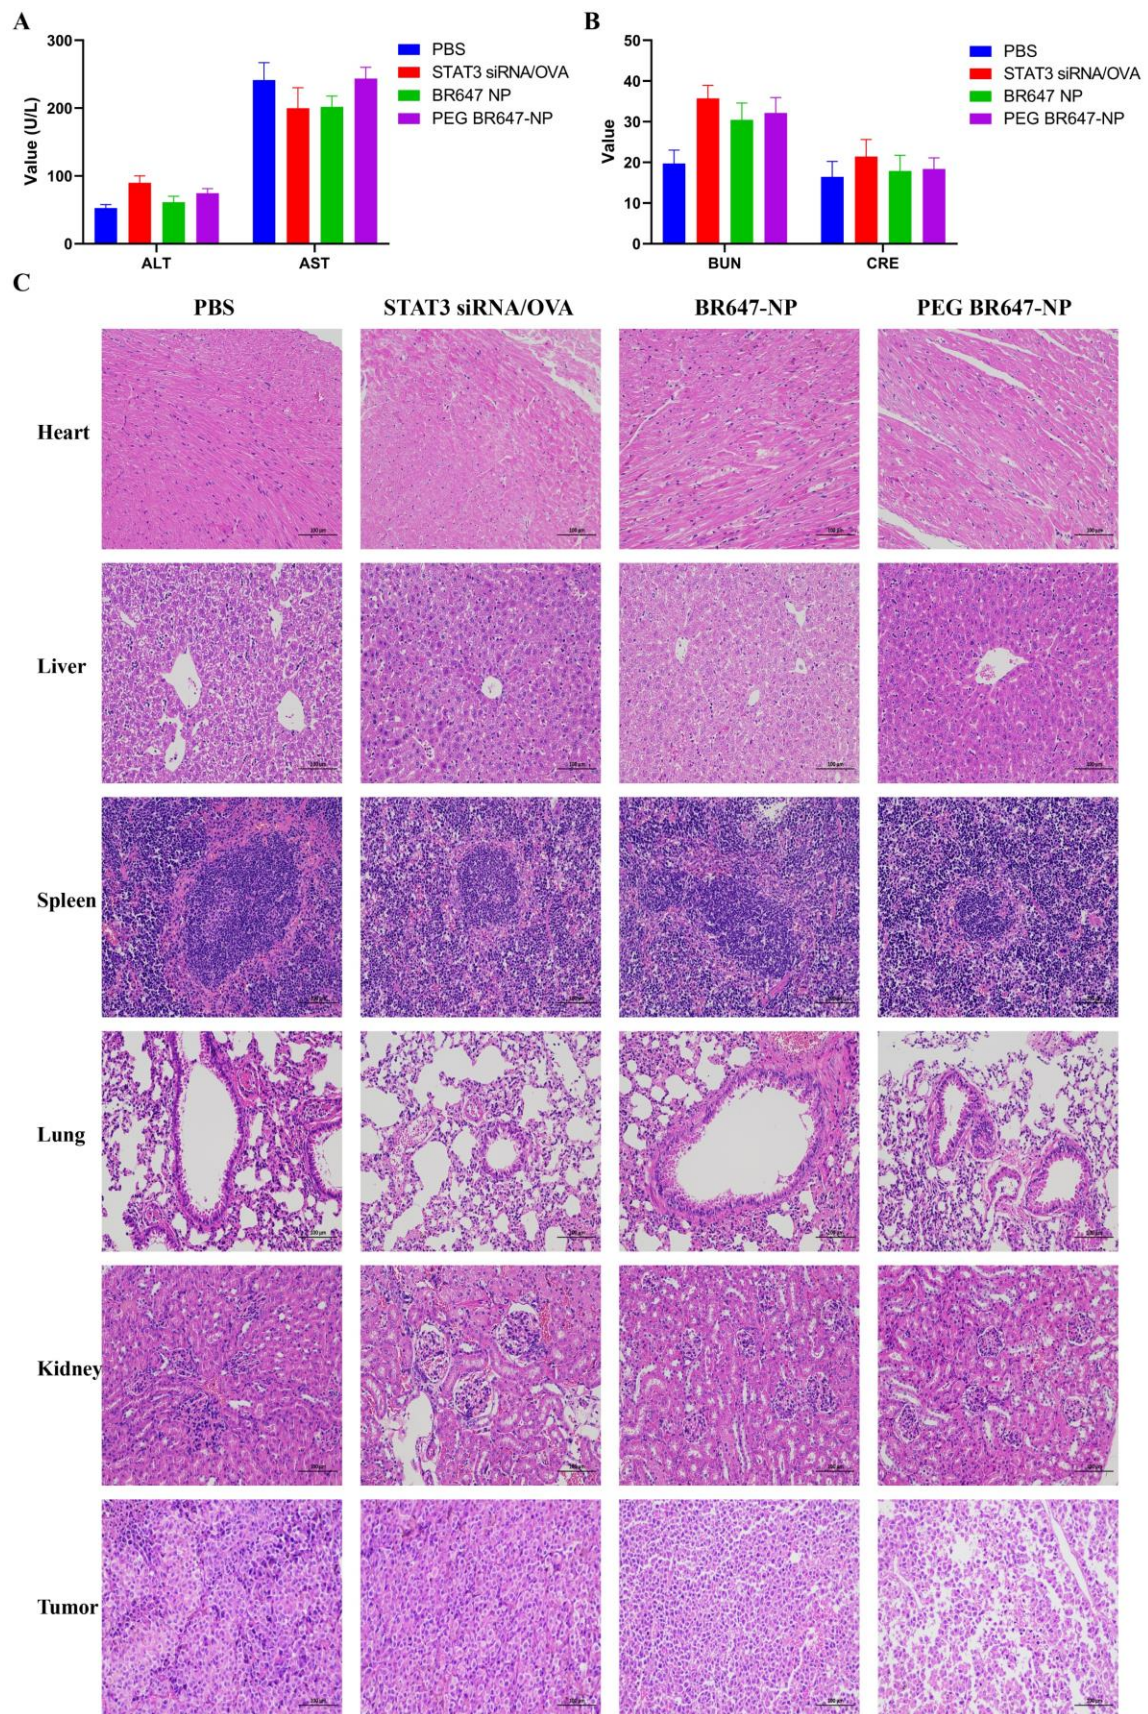

Fig S8. The serum levels of markers for (A) liver function and (B) kidney function (n = 5). (C) H&E staining images of the major organs and tumors (n = 3) ( $\times 200$ ).



Table S1. Optimize the weight ratio of BR647 to siRNA to OVA in BR647-NP.

|                                     | 50:1:3        | 150:1:3       | 500:1:3       |
|-------------------------------------|---------------|---------------|---------------|
| Z-average (nm)                      | 231.5 ± 76.95 | 98.6 ± 12.58  | 181.2 ± 74.21 |
| PDI                                 | 0.474 ± 0.066 | 0.218 ± 0.014 | 0.382 ± 0.012 |
| Zeta potential (mV)                 | 10.4 ± 0.72   | 7.53 ± 0.234  | 21.3 ± 1.51   |
| Encapsulation Efficiency of siRNA   | 97.65%        | 100.99%       | 65.78%        |
| Encapsulation Efficiency of OVA     | 51.24%        | 94.87%        | 70.48%        |
| Transfection in B16F10 <sup>a</sup> | 14.7          | 25.0          | 13.1          |
| Transfection in DC2.4 <sup>a</sup>  | 13.8          | 22.5          | 12.3          |

<sup>a</sup> compared to free FAM-STAT3 siRNA solution
